# Supplementary material
Source: PubMed Central journal article supplement (PMC3887990)
Supplement: molcell-36-4-362-10-supplementary.pdf [file molcell-36-4-362-10-supplementary.pdf]

1 **Supplementary material**

2 **Enzymatic synthesis of apigenin glucosides by glucosyltransferase (YjiC) from**  
3 ***Bacillus licheniformis* DSM 13**

4  
5 **Rit Bahadur Gurung<sup>1</sup>, Eun-Hee Kim<sup>2</sup>, Tae-Jin Oh<sup>1</sup> and Jae Kyung Sohng<sup>1</sup>**

6 <sup>1</sup>*Department of Pharmaceutical Engineering, Institute of Biomolecule Reconstruction,*  
7 *Sun Moon University, 100, Kalsan-ri, Tangjeonmyeon, Asan-si, Chungnam 336-708,*  
8 *Republic of Korea*

9 <sup>2</sup>*Division of Magnetic Resonance, Korea Basic Science Institute, Ochang, Chungbuk*  
10 *363-883, Republic of Korea*

11  
12 \*Correspondence author: Jae Kyung Sohng

13 Tel: +82(41)530-2246

14 Fax: +82(41)544-2919

15 E-mail: [sohng@sunmoon.ac.kr](mailto:sohng@sunmoon.ac.kr)

16  
17  
18 Running title: Enzymatic Synthesis of Apigenin glucosides

21 **Supplementary Figure Legends**

22

23 **Figure S1.** SDS-PAGE analysis of the crude soluble protein prepared from *E.coli*  
24 harboring pET302-YjiC (S) and affinity purified fractions (Y1-Y4) of YjiC, 44.7 kDa. M,  
25 marker.

26

27 **Figure S2.** HRLC-ESI-Q-TOF-MS/MS analysis of *in-vitro* glycosylation reaction  
28 mixture. (a) MS spectra of APG1, a monoglucoside of apigenin ( $m/z$  433.1112  $[M+H]^+$ )  
29 and substrate, apigenin ( $m/z$  271.0538  $[M+H]^+$ ); (b) MS spectra of APG2, a  
30 monoglucoside of apigenin ( $m/z$  433.1092  $[M+H]^+$ ) and substrate, apigenin ( $m/z$   
31 271.0518  $[M+H]^+$ ); (c) MS spectra of APG3, a diglucoside of apigenin ( $m/z$  595.1677  
32  $[M+H]^+$ ) and substrate, apigenin ( $m/z$  271.0520  $[M+H]^+$ ).

33

34 **Figure S3.** a)  $^1H$  NMR analysis of aglycone, APG (apigenin). b)  $^{13}C$  NMR analysis of  
35 aglycone, APG (apigenin).

36

37 **Figure S4.** a)  $^1H$  NMR analysis of APG1 (apigenin 4'-O-glucoside). b)  $^{13}C$  NMR  
38 analysis of APG1 (apigenin 4'-O-glucoside).

39

40 **Figure S5.** a)  $^1H$  NMR analysis of APG2 (apigenin 7-O-glucoside). b)  $^{13}C$  NMR  
41 analysis APG2 (apigenin 7-O-glucoside).

42

43 **Figure S6.** a)  $^1H$  NMR analysis of APG3 (apigenin 4',7-O-diglucoside). b)  $^{13}C$  NMR  
44 analysis of APG3 (apigenin 4',7-O-diglucoside).

45

46 **Figure S1.**

47

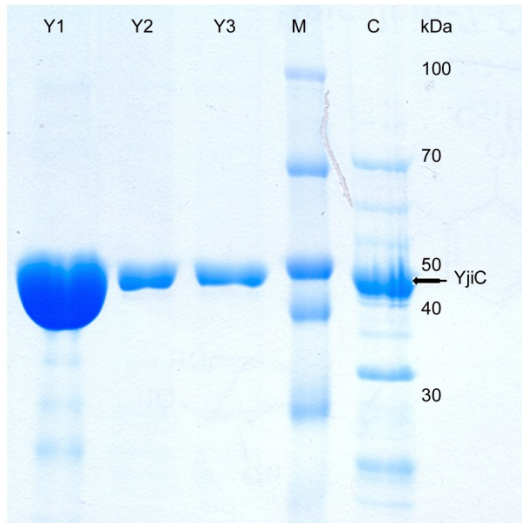

48

49

50

51 **Figure S2.**

52 a)

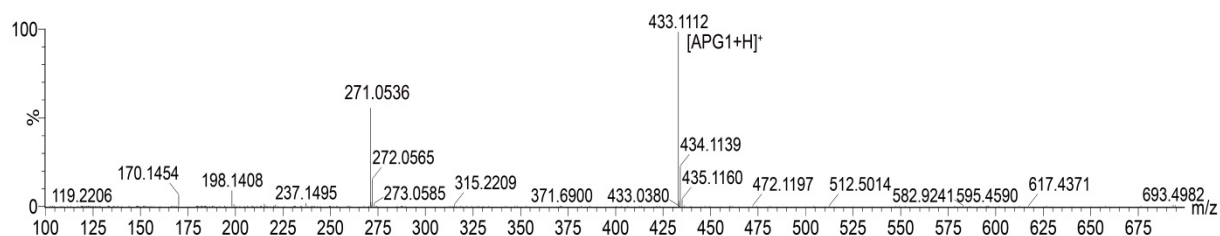

53

54 b)

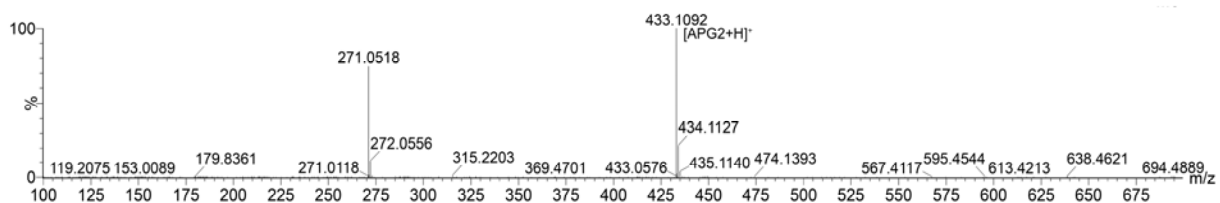

55

56 c)

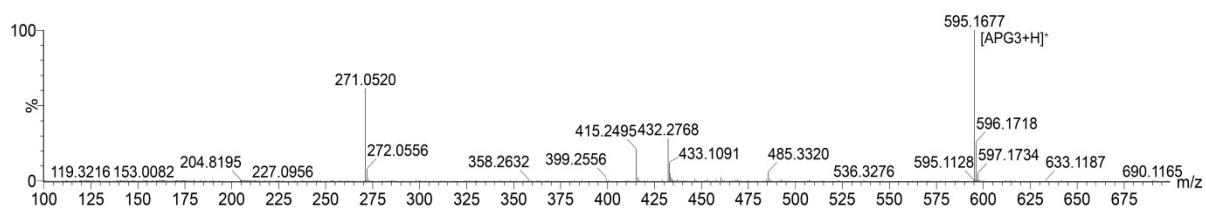

57

58

59

60 **Figure S3.**

61 a)

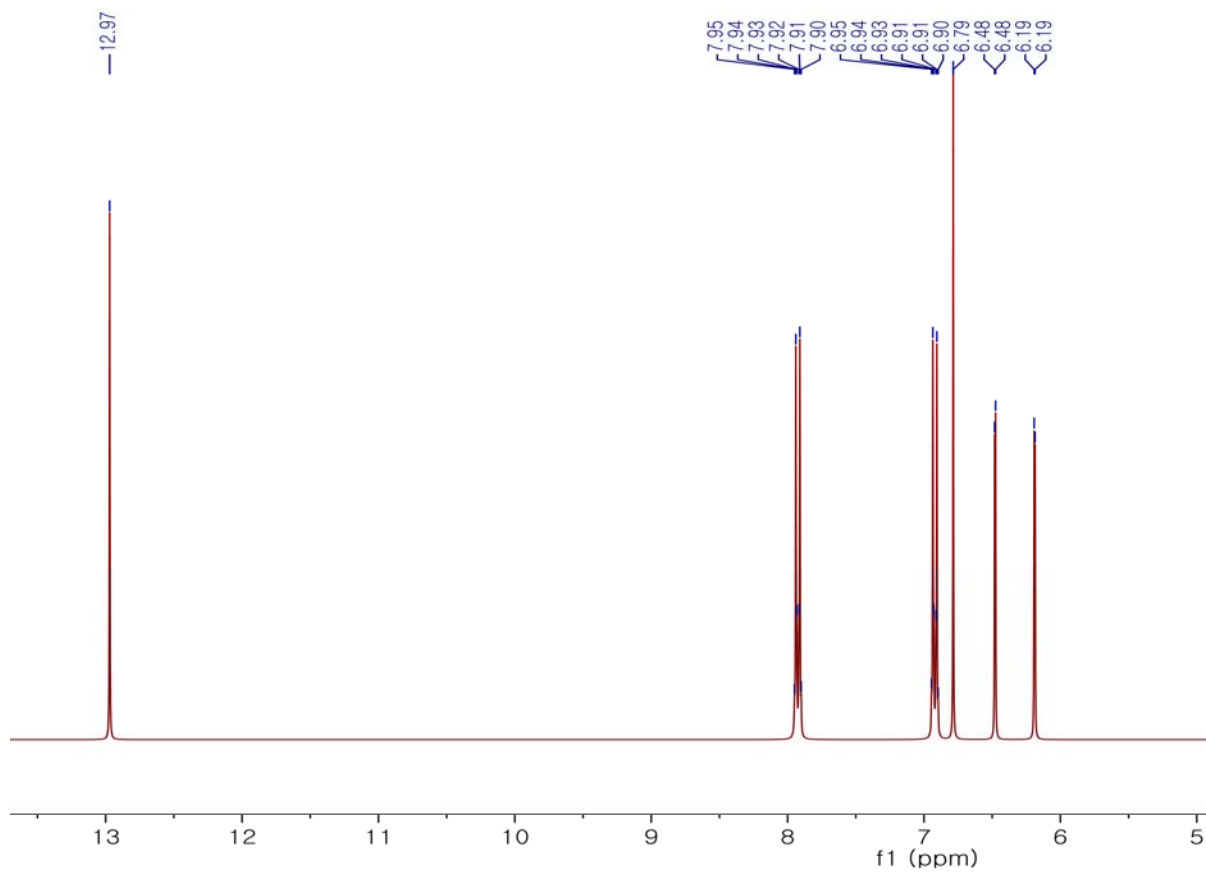

62

63 <sup>1</sup>H NMR data (in DMSO-d<sub>6</sub>, 300 MHz) δ (ppm): 12.97 (1H, s, 5-OH), 7.92 (2H, d, J =

64 8.8 Hz, H-2', 6'), 6.92 (2H, d, J = 8.8 Hz, H-3', 5'), 6.79 (1H, s, H-3), 6.48 (1H, d, J =

65 2.1 Hz, H-8), 6.19 (1H, d, J = 2.1 Hz, H-6).

66

67 **Figure S3.**

68 b)

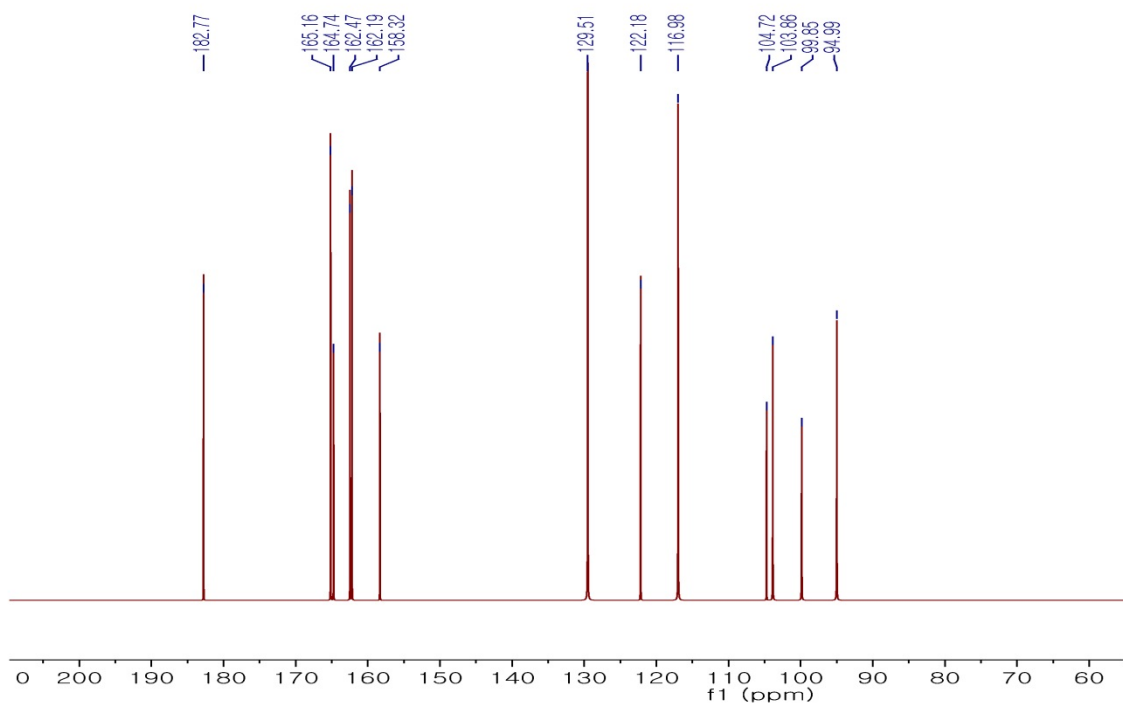

69

70 <sup>13</sup>C NMR (75 MHz, DMSO-d<sub>6</sub>) δ (ppm): 182.77 (C-4), 165.16 (C-2), 164.74 (C-7),  
71 162.47 (C-9), 162.19 (C-4'), 158.32 (C-5), 129.51 (C-2', C-6'), 122.18 (C-1'), 116.98  
72 (C-3', C-5'), 103.86 (C-10), 99.85 (C-6), 94.99 (C-8).

73

74 **Figure S4.**

75 a)

76

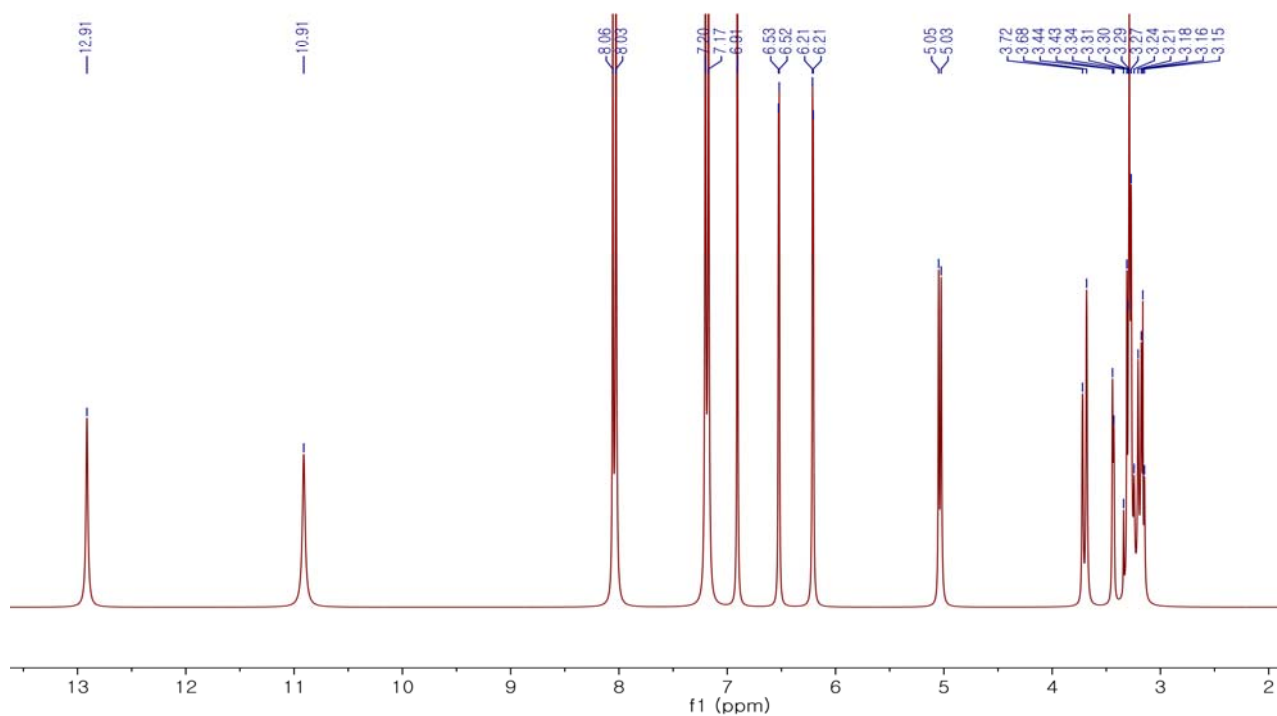

77

78 <sup>1</sup>H NMR data (in DMSO-d<sub>6</sub>, 300 MHz) δ (ppm): 12.91 (1H, s, 5-OH), 10.91 (1H, s, 7-  
79 OH), 8.04 (2H, d, J = 8.8 Hz, H-2', 6'), 7.19 (2H, d, J = 8.8 Hz, H-3', 5'), 6.91 (1H, s,  
80 H-3), 6.52 (1H, d, J = 2.1 Hz, H-8), 6.21 (1H, d, J = 2.1, H-6), 5.04 (1H, d, J = 6.8 Hz,  
81 H-1"), 3.15 – 3.72 (5H, sugar protons).

82

83 **Figure S4.**

84 **b)**

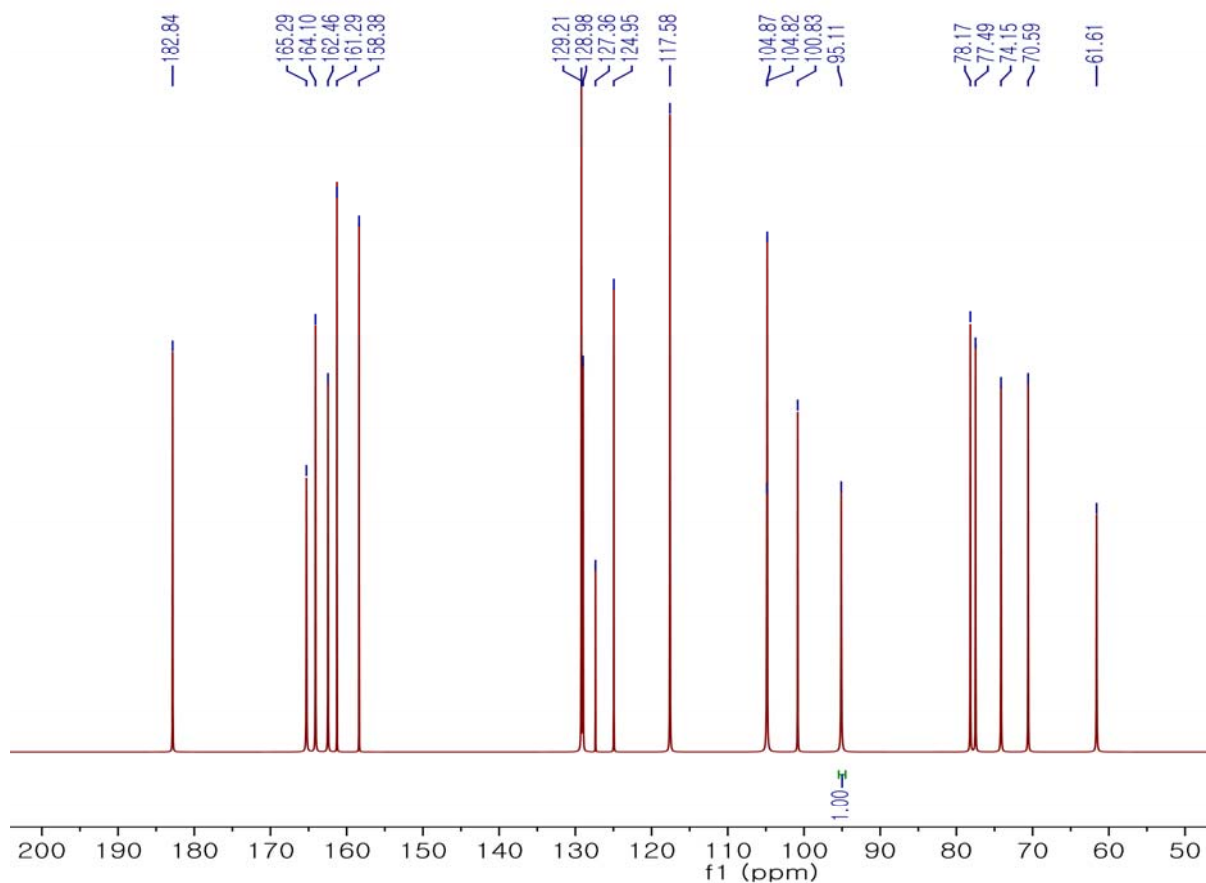

85

86  $^{13}\text{C}$  NMR (75 MHz, DMSO- $d_6$ )  $\delta$  (ppm): 182.84 (C-4), 165.29 (C-2), 164.10 (C-5),

87 162.46 (C-4'), 161.29 (C-9), 129.21 (C-2', C-6'), 124.95 (C-1'), 117.58 (C-3', C-5'),

88 104.87 (C-10), 104.82 (C-3), 100.83 (C-1''), 95.11 (C-8), 78.17 (C-3''), 77.49 (C-5''),

89 74.15 (C-2''), 70.59 (C-4''), 61.61 (C-6'').

90

91



92 **Figure S5.**

93 a)

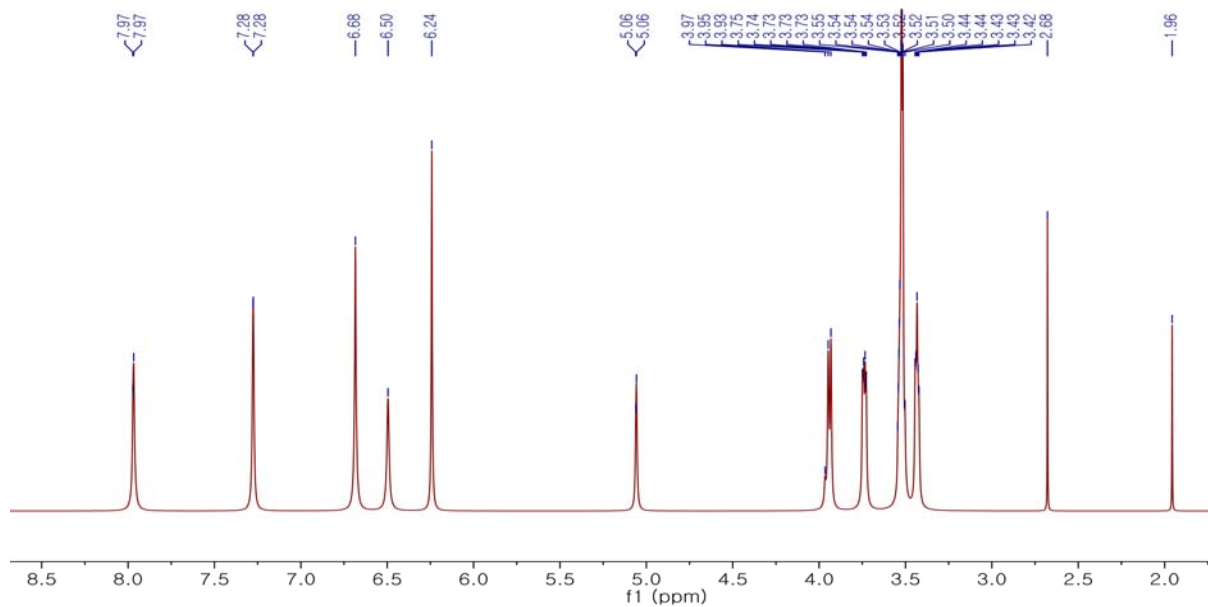

94

95 <sup>1</sup>H NMR data (in MeOD, 800 MHz) δ (ppm): 7.97 (2H, d, J = 8.7 Hz, H-2', 6'), 7.28  
96 (2H, d, J = 8.7 Hz, H-3', 5'), 6.68 (1H, s, H-3), 6.50 (1H, s, H-8), 6.24 (1H, s, H-6),  
97 5.04 (1H, d, J = 6.9 Hz, H-1"), 3.42 – 3.97 (5H, sugar protons).

98

99

100 **Figure S5.**

101 **b)**

102

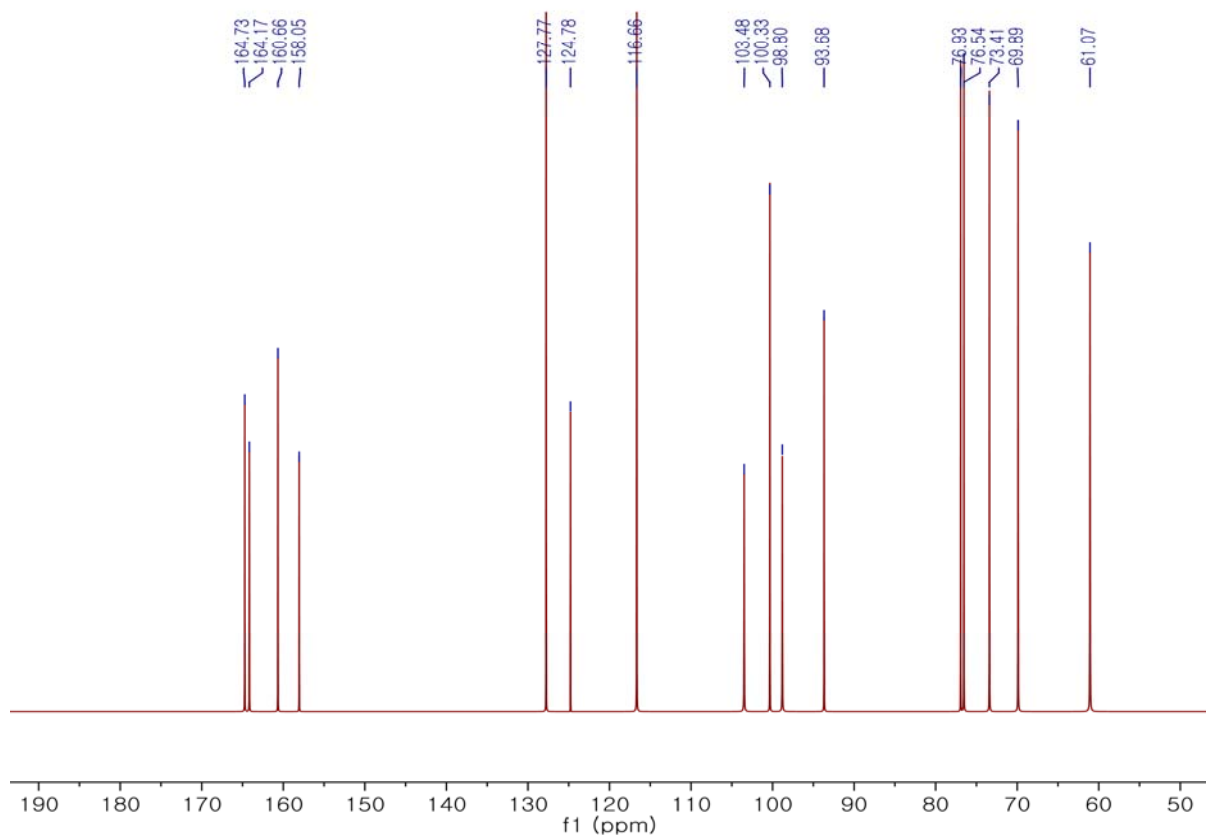

103

104 <sup>13</sup>C NMR (201 MHz, MeOD) δ (ppm): **182.84 (C-4)**, 164.73 (C-2), 164.17 (C-5),

105 160.66 (C-4'), 158.05 (C-9), 127.77 (C-2', C-6'), 124.78 (C-1'), 116.66 (C-3', C-5'),

106 103.48 (C-10), 100.33 (C-3), 98.80 (C-1''), 93.68 (C-8), 76.93 (C-3''), 76.54 (C-5''),

107 73.41 (C-2''), 69.89 (C-4''), 61.07 (C-6'').

108

109 **Figure S6.**

110 a)

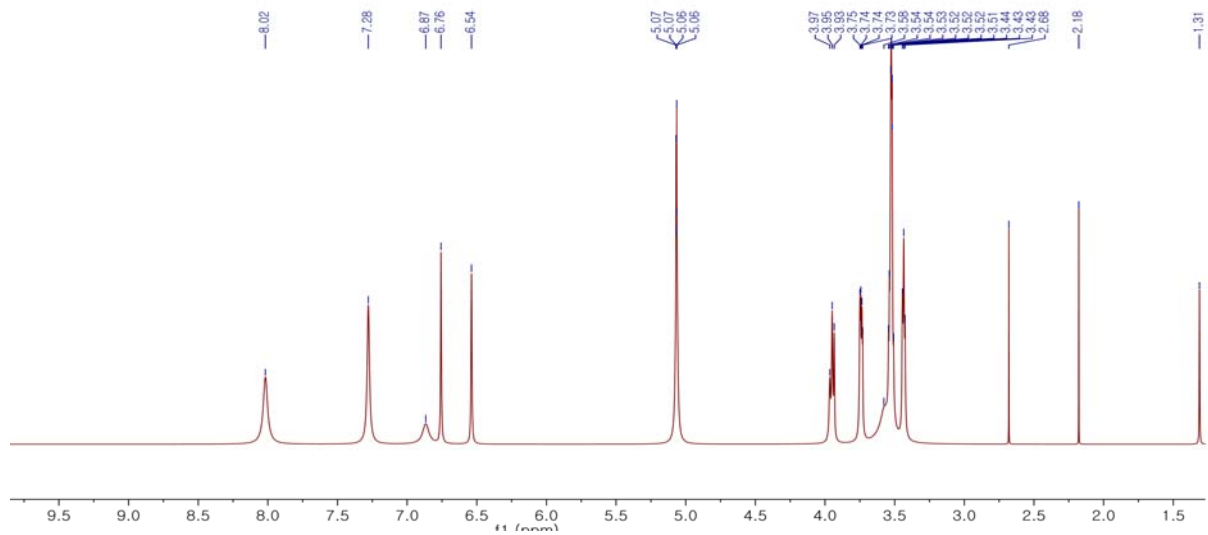

111

112 <sup>1</sup>H NMR data (in MeOD, 900 MHz)  $\delta$  (ppm): 8.02 (2H, s, H-2', 6'), 7.28 (2H, s, H-3',  
113 5'), 6.87 (1H, s, H-3), 6.76 (1H, s, H-8), 6.54 (1H, s, H-6), 5.07 (1H, d, H-1''), 5.06  
114 (1H, d, H-1'''), 3.37- 3.97 (10H, sugar protons)

115

116 **Figure S6.**

117 **b)**

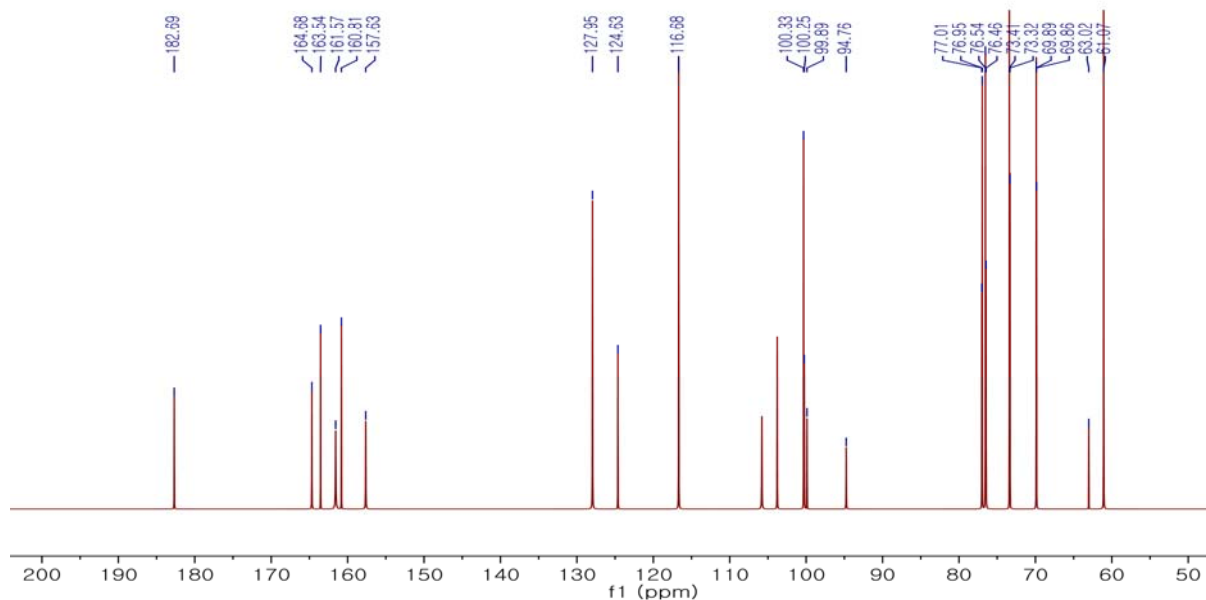

118

119  $^{13}\text{C}$  NMR (226 MHz, MeOD)  $\delta$  (ppm): 182.69 (C-4), 164.68 (C-5), 163.54 (C-2),  
120 161.57 (C-4'), 160.81 (C-9), 157.63 (C-7), 127.95 (C-2', C-6'), 124.63 (C-1'), 116.68  
121 (C-3', C-5'), 105.80 (C-3), 103.79 (C-10), 100.33 (C-1'''), 100.25 (C-1''), 99.89 (C-6),  
122 94.76 (C-8), 77.01-61.07 (C-2''-C-6'', C-2'''-C-6''').

123
